# Supplementary material
Source: Royal Society of Chemistry journal article supplement (doi:10.1039/d5ma01438g)
Supplement: d5ma01438g1.pdf [file d5ma01438g1.pdf]

## Electronic Supplementary Material

(ESI)

### Amine-Modified MOF-14 as a Tunable Platform for CO<sub>2</sub> Adsorption and Supercapacitor Energy Storage

Pooja Sharda<sup>a</sup>, Manisha<sup>b</sup>, Anshu Sharma<sup>c</sup>, Miroslav Almäši<sup>d#</sup>, Ankur Jain<sup>a,e,f\*</sup>

<sup>a</sup>Centre for Renewable Energy & Storage, Suresh Gyan Vihar University, Jaipur 302017 India

<sup>b</sup>Department of Physics and Astrophysics, School of Basic Sciences, Central University of Haryana, Mahendragarh 123031, India

<sup>c</sup>Department of Applied Sciences and Humanities, School of Engineering & Technology, Central University of Haryana, Mahendragarh 123031, India

<sup>d</sup>Department of Inorganic Chemistry, Faculty of Science, P. J. Safarik University, Moyzesova 11, Kosice 041 54 Slovak Republic

<sup>e</sup>Natural Science Centre for Basic Research & Development, Hiroshima University, Higashi-Hiroshima 739-8530 Japan

<sup>f</sup>Institute for Catalysis and Energy Solutions, College of Science, Engineering and Technology, University of South Africa, Private Bag X6, Florida, 1710, South Africa

Corresponding authors: \*[ankur.j.ankur@gmail.com](mailto:ankur.j.ankur@gmail.com); #[miroslav.almasi@upjs.sk](mailto:miroslav.almasi@upjs.sk)

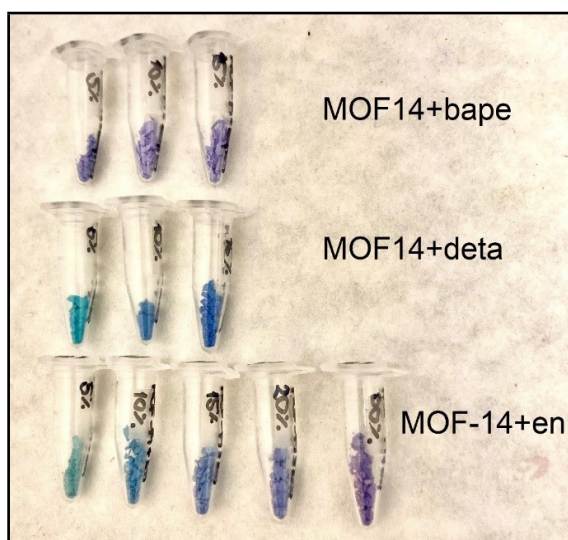

**Figure S1** Prepared amine-modified MOF-14 samples with en (ethylenediamine), deta (diethylenetriamine), and bape (1,2-bis(3-aminopropylamino)ethane).

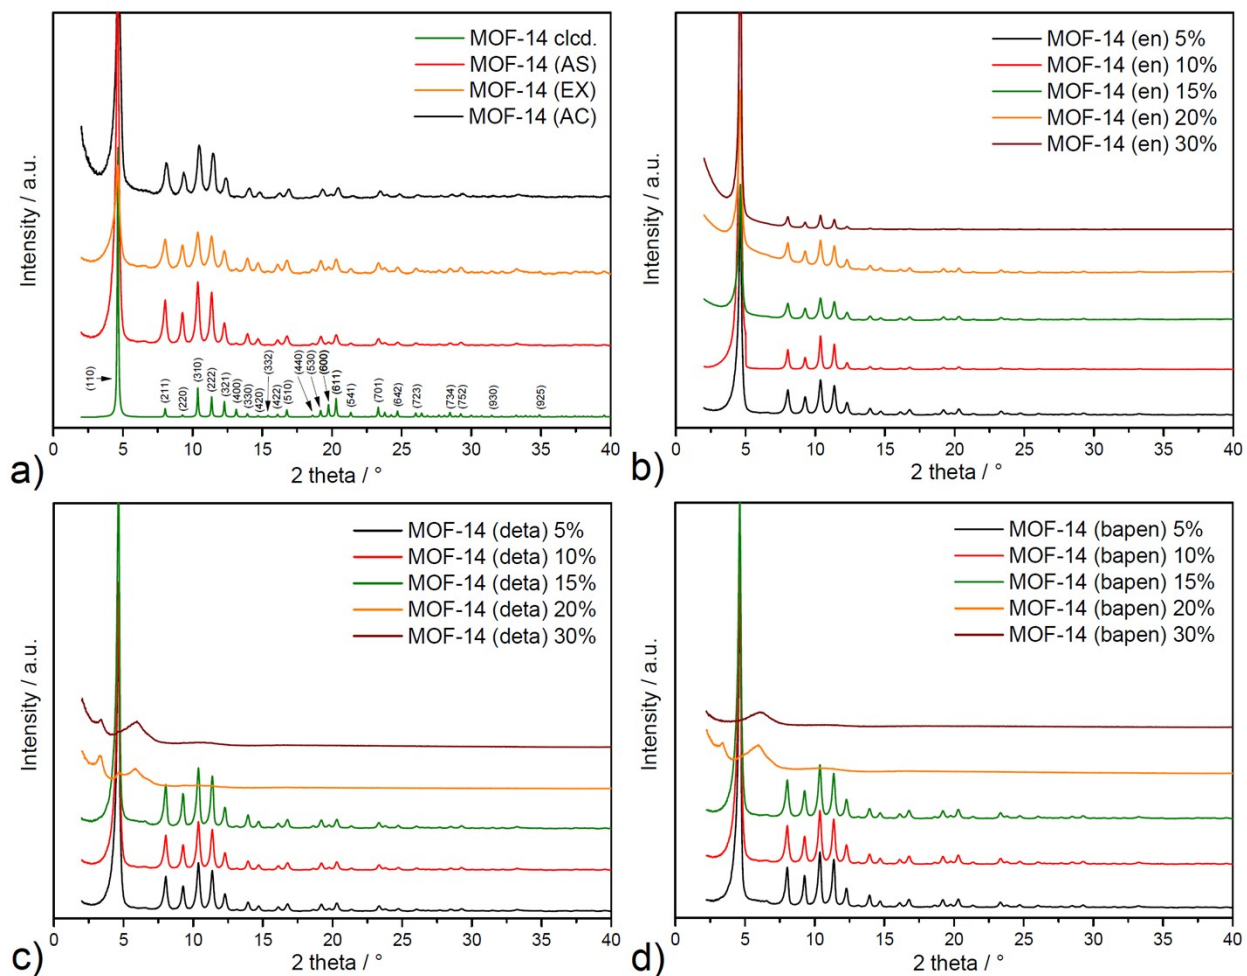

**Figure S2** PXRD patterns of a) calculated and experimental MOF-14 samples (as-synthesized, solvent-exchanged, and activated) and materials obtained after post-synthetic modification with b) ethylenediamine (en), c) diethylenetriamine (deta), and d) 1,2-bis(3-aminopropylamino)ethane (bape) with different mass fractions (5, 10, 15, 20 and 30%).

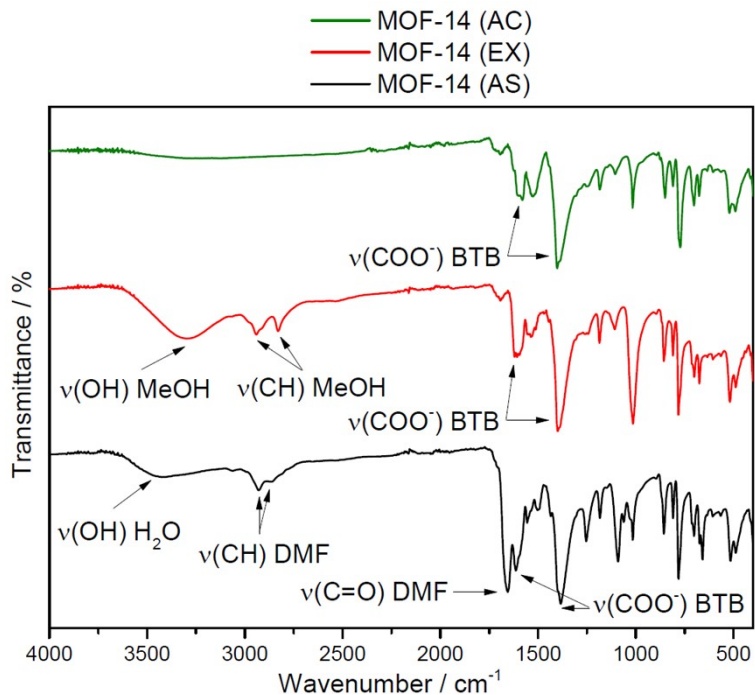

**Figure S3** IR spectra of as-synthesized MOF (MOF-14 (AS), black line), methanol-exchange material (MOF-14 (EX), red line) and activated sample (MOF-14 (AC), green line) with an assignment of characteristic absorption bands.

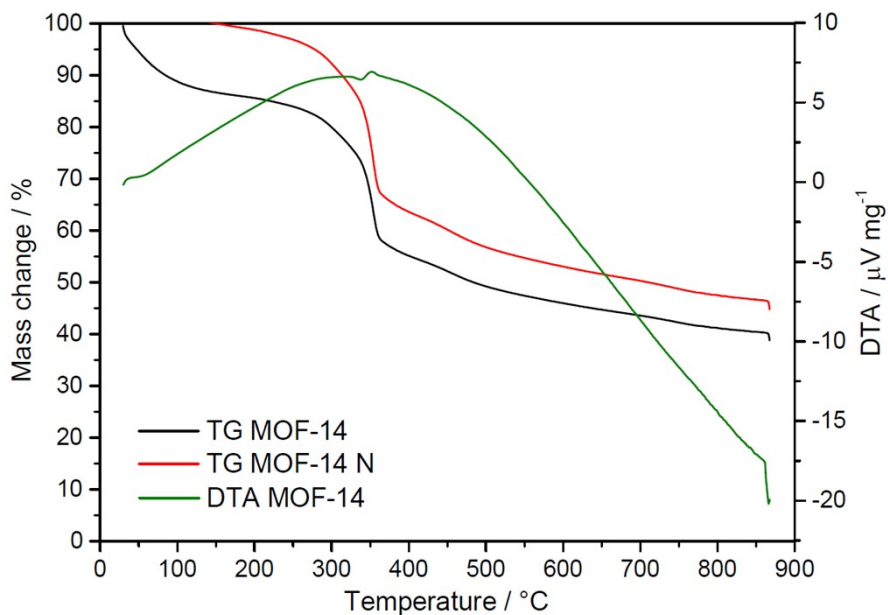

**Figure S4** TG (black line), normalized TG (red line) and DTA curve (green line) of methanol-exchanged MOF-14 sample.

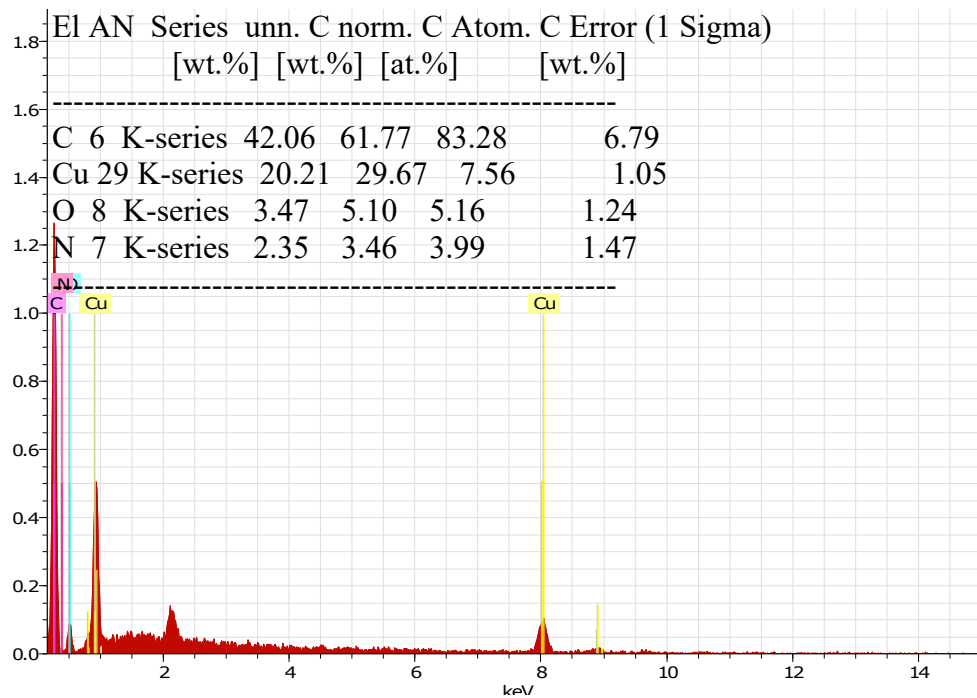

**Figure S5** Energy-dispersive X-ray (EDX) spectrum of MOF-14 (en) 30% (inset shows the table with elements present in sample with corresponding weight and atomic %).

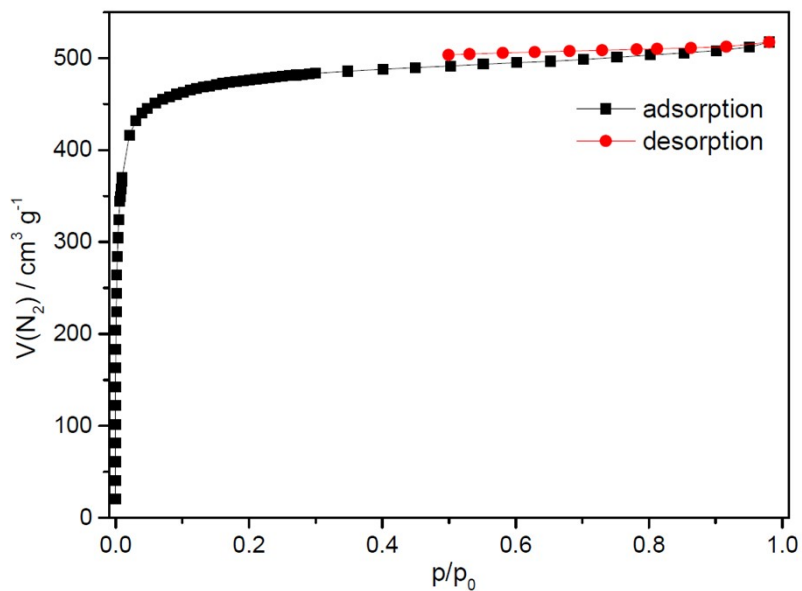

**Figure S6** Nitrogen adsorption/desorption isotherm of activated MOF-14 (AC) measured at -196 °C.

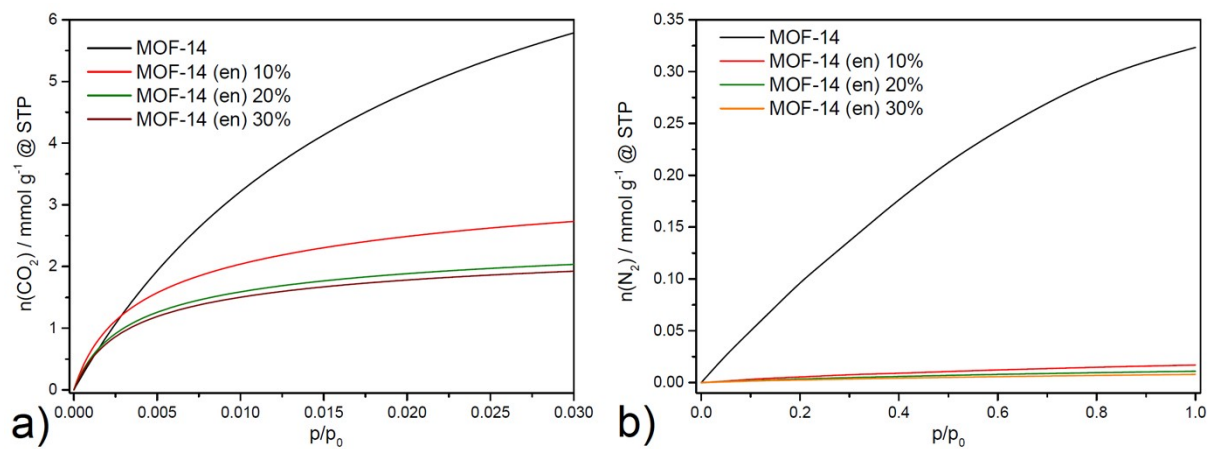

**Figure S7** a) Carbon dioxide and b) nitrogen adsorption isotherms of activated MOF-14 (AC) and en-modified samples MOF-14 (en) 10%, MOF-14 (en) 20% and MOF-14 (en) 30% measured at 0 °C.
